39 difficulty to observe, live and *in vivo*, synapse formation at the level of filopodial dynamics in  
40 intact, normally developing brains<sup>13,14</sup>.

41 Fly photoreceptors (R cells) are the primary retinal output neurons that relay visual  
42 information with highly stereotypic synaptic connections in dense brain regions, namely the  
43 lamina and medulla neuropils of the optic lobe<sup>15-17</sup>. Intact fly brains can develop in culture,  
44 enabling live imaging at the high spatiotemporal resolution necessary to measure  
45 photoreceptor axon filopodial dynamics and synapse formation throughout the entire  
46 developmental period of circuit assembly<sup>13,14,18</sup>. Axonal filopodia inside the developing brain  
47 stabilize to form synapses through the accumulation of synaptic building material, but how  
48 limiting amounts of building material in filopodia are regulated is unknown<sup>14</sup>.

49 Macroautophagy (autophagy hereafter) is a ubiquitous endomembrane degradation  
50 mechanism implicated in neuronal maintenance and function<sup>19</sup>. Neuronal autophagy has  
51 been linked to neurodegeneration<sup>20</sup> as well as synaptic function in the mature nervous system  
52<sup>21,22</sup>. Comparably little is known about developmental autophagy in the brain. Functional  
53 neurons develop in the absence of autophagy<sup>19,23,24</sup>. In specific neurons in worms and flies,  
54 loss of autophagy leads to reduced synapse development<sup>25,26</sup>. By contrast, in the mouse brain  
55 loss of autophagy in neurons leads to increased dendritic spine density due to defective  
56 pruning after synapse formation<sup>27,28</sup>. Despite numerous links to neurodevelopmental  
57 disorders, it remains unknown if and how developmental autophagy can contribute to synaptic  
58 partner choice and circuit connectivity, especially in dense brain regions.

59 In this study, we show that loss of autophagy in *Drosophila* photoreceptor neurons  
60 leads to increased synapse formation and the recruitment of incorrect postsynaptic partners.  
61 Autophagy directly and selectively regulates the kinetics of synaptogenic axon filopodia, a  
62 phenotype that could only be revealed through live observation during intact brain  
63 development. Autophagic modulation of the kinetics of synaptogenic filopodia restricts what  
64 neurons 'see each other' to form synapses, thereby critically contributing to the developmental  
65 program that ensures synaptic specificity during brain development.

66

## 67 **Results**

68 We have previously observed the formation of autophagosomes at the axon terminals  
69 of developing photoreceptor neurons R1-R6 in the developing *Drosophila* brain, but their  
70 function has remained unknown<sup>29</sup>. Previous analyses of loss of autophagy in fly  
71 photoreceptors have not revealed any obvious developmental defects<sup>24,30,31</sup>.

72

### 73 **Flies with autophagy-deficient photoreceptors exhibit increased neurotransmission and** 74 **visual attention behavior**

75 To probe for previously undetected synaptic defects, we blocked autophagy in  
76 developing photoreceptor neurons using molecularly well-defined mutants for the essential  
77 autophagy proteins Atg7 and Atg6 (fly homolog of Beclin-1)<sup>24,30</sup>. We validated loss of the  
78 key autophagosome marker Atg8 in both *atg7* and *atg6* mutants (Supplementary Fig. 1a-b'  
79 and d). Rescue of *atg6* with the photoreceptor-specific driver GMR-Gal4 reversed this effect  
80 and led to a significant increase in Atg8-positive compartments compared to wild type  
81 (Supplementary Fig. 1c-c' and d).

82 As expected, the eyes and axonal projections of photoreceptor neurons mutant for *atg6*  
83 or *atg7* in otherwise wild type brains exhibited no obvious defects in fixed preparations (Fig.  
84 1a, b). Photoreceptor neurons are known to exhibit neurodegeneration with ageing<sup>31</sup>. To  
85 assay photoreceptor function directly following autophagy-deficient development, we  
86 therefore recorded electroretinograms (ERGs) from the eyes of newly eclosed flies.  
87 Autophagy-deficient photoreceptors exhibited normal depolarizing responses to light,  
88 indicating functional phototransduction and healthy neurons (Fig. 1c, d). Surprisingly, 'on'  
89 transient amplitudes, which are indicative of synaptic transmission and the ability to elicit a  
90 postsynaptic response, were increased 30-50% in both mutants (Fig. 1c, e). Conversely,  
91 increased autophagy in transgenically rescued *atg6* photoreceptors reversed this effect and  
92 resulted in a significant reduction of 'on' transients (Fig. 1c, e).

93 Next, we asked whether loss of autophagy selectively in photoreceptors affected fly  
94 vision. We used the simple visual choice assay Buridan's paradigm, in which wing-clipped  
95 flies walk freely in a circular, uniformly illuminated arena with two high contrast black stripes  
96 placed opposite to each other (Fig. 1f)<sup>32</sup>. In this assay, flies with functional vision walk back  
97 and forth between the two high contrast objects. We chose the parameter 'stripe deviation',  
98 which measures how much a single fly deviates from an imaginary line between two black  
99 stripes, as a behavioral read-out of visual attention (Fig. 1g). Flies with *atg6* or *atg7*-deficient  
100 photoreceptors were assayed and compared to their genetic background matched controls.  
101 Surprisingly, in both mutants the flies with autophagy-deficient photoreceptors exhibited  
102 increased visual attention behavior (decreased stripe deviation) compared to their genetically  
103 matched controls (Fig. 1h, i and Supplementary Fig. 2). Increased autophagy in *atg6* rescued  
104 photoreceptors reversed this effect again in an overcompensatory manner similar to ERG  
105 responses (Fig. 1h, i). We conclude that flies with photoreceptors that developed in the

106 absence of autophagy can see, but their vision is characterized by both increased  
107 neurotransmission and increased visual attention.

108

### 109 **Autophagy-deficient *Drosophila* photoreceptors form supernumerary synapses**

110 To assess whether the alterations in neurotransmission and vision were due to altered  
111 numbers of synapses, we generated sparse clones of photoreceptors R1-R6, and R7 expressing  
112 the active zone marker GFP-Brp<sup>short</sup>. This marker specifically localizes to presynaptic active  
113 zones without affecting synaptic development or function and is suitable for live imaging<sup>14,33</sup>.  
114 Loss of autophagy resulted in a 25%-80% increase in synapse numbers, while increased  
115 autophagy in rescued *atg6* mutant photoreceptors reversed this effect and significantly  
116 reduced synapse numbers (Fig. 2a-f). Photoreceptors R1-R6 form columnar terminals in a  
117 single layer neuropil, whereas R7 axon terminals span six morphologically distinct layers and  
118 form the majority of synapses in the most proximal layer M6<sup>17,34</sup>. We were therefore  
119 surprised to see many supernumerary synapses in autophagy-deficient R7 axon terminals at  
120 more distal layers M1-M3 (Fig. 2g; red boxes in Fig. 2a-d'). These putative synapses along  
121 the distal shaft of autophagy-deficient R7 axons were stable based on live imaging of Brp<sup>short</sup>-  
122 labelled active zones with 15 min resolution over several hours at P70 (70% pupal  
123 development; Supplementary Movie 1). Brp stability is indicative of mature synapses and  
124 suggests that ectopic Brp puncta in fixed images are not the consequence of axonal transport  
125 defects or defective synaptic capture of Brp-positive transport vesicles. These observations  
126 raised the question whether loss of autophagy leads to genuine supernumerary synapses and,  
127 if so, whether these would be formed with correct postsynaptic partners.

128

### 129 **Autophagy-deficient R7 photoreceptors contact incorrect postsynaptic neurons**

130 The synaptic partners of R7 photoreceptors have been quantitatively characterized  
131 based on EM reconstruction of several medulla columns, revealing highly stereotypic  
132 connections<sup>17</sup>. The main post-synaptic target of R7 photoreceptors is the wide-field amacrine  
133 neuron Dm8<sup>17,35</sup>. Apart from Dm8s, R7s form fewer connections with Tm5 neuron subtypes  
134 that have dendritic fields spanning from M3 to M6<sup>34,35</sup>. To identify the postsynaptic partners  
135 of autophagy-deficient R7 photoreceptors, we used the recently developed anterograde trans-  
136 synaptic tracing method '*trans*-Tango', which labels post-synaptic neurons for a given neuron  
137 without a need for previous knowledge about the nature of the connections<sup>36</sup>. We used an R7-  
138 specific driver (Rhodopsin4-Gal4) and restricted its expression to mutant R7 photoreceptors,  
139 while all other neurons, including all postsynaptic partners, are wild type. Consistent with  
140 known post-synaptic targets of R7s, *trans*-Tango with wild-type R7s mainly labelled Dm8s  
141 and Tm5s (Fig. 3a). By contrast, loss of autophagy in R7s led to more widespread labelling of  
142 post-synaptic neurons (Fig. 3b) and an overall increase of the number of postsynaptically  
143 connected cells, as expected for supernumerary functional synapses (Fig. 3c). Through  
144 application of a sparse-labeling protocol of *trans*-Tango, we further identified several cell  
145 types, including Mi1, Mi4, Mi8, Tm1, C2, and C3 that are not normally postsynaptic to R7

146 based on connectome data <sup>15,17,37,38</sup> (Fig. 3d, e). Mi1 and Mi4, for example, are part of the  
147 motion-detection pathway, to which R7 is not known to provide input <sup>39,40</sup>. Notably, the  
148 number of individual neurons detected for these six ectopically connected neurons correlated  
149 distinctly with the position of their presumptive dendritic trees: Mi1, C3 and C2 were most  
150 often labeled and all three have presumptive dendrites in layers M1 and M5 (Fig. 3e, f) <sup>41</sup>;  
151 most ectopic R7 synapses were detected in layer M1, M5 and M6 (Fig. 2g); at the other end  
152 of the spectrum, Mi8 and Tm1 were both 4-5fold less often detected and have presumptive  
153 dendrites in layer M2 and M3, where we counted fewer ectopic synapses (Fig. 2g and Fig. 3e,  
154 f) <sup>41</sup>. These findings suggest that the postsynaptic neurons labeled by *trans*-Tango are  
155 incorrect partners connected through axon-dendritic contacts with R7.

156

### 157 **Synapses with incorrect postsynaptic neurons are functional based on activity-** 158 **dependent GRASP**

159 To test whether these contacts are functional synapses, we next used the activity-  
160 dependent GRASP method (GFP reconstitution across synaptic partners), which is based on  
161 trans-synaptic complementation of split GFP only when synaptic vesicle release occurs <sup>42,43</sup>.  
162 Based on available cell-specific driver lines and the underlying genetics, we could test three  
163 of the ectopic pairs identified with *trans*-Tango: potential synapses between R7 and Mi1, C2  
164 or Mi4. For all three cases, wild type neurons rarely showed isolated synaptic signals (Fig.  
165 4a-c'). In contrast, *atg6* mutant photoreceptors formed abundant synapses in all three cases  
166 (Fig. 4d-f'). These findings also indicate that the *trans*-Tango results were not due to an  
167 effect of altered autophagy on the ectopically expressed proteins of the *trans*-Tango system.  
168 We conclude that loss of autophagy in R7 photoreceptor terminals leads to ectopic synapse  
169 formation with inappropriate postsynaptic neurons.

170 Taken together, we conclude that loss of autophagy in photoreceptors does not affect  
171 overall axon terminal morphology and transmission of visual input, but selectively leads to  
172 increased synapse formation, which includes inappropriate postsynaptic partners, and  
173 increased visual attention behavior. But how does defective autophagy at the developing pre-  
174 synapse affect synaptic partner choice mechanistically?

175

### 176 **Autophagy modulates the stability of synaptogenic filopodia**

177 To test when and where exactly autophagosomes function during synapse formation,  
178 we performed live imaging experiments of autophagosome formation in developing R7 axon  
179 terminals in developing brains. Autophagosomes have previously been shown to form at  
180 axon terminals in vertebrate primary neuronal cell culture using the temporal series of  
181 autophagosome maturation reporters Atg5-GFP (early) and Atg8-GFP (late) <sup>44</sup>. Surprisingly,  
182 we found autophagosome formation based on these probes selectively at the rare, bulbous tips  
183 of synaptogenic filopodia of R7 axon terminals, followed by filopodial collapse (Fig. 5a;  
184 Supplementary Fig. 3; Supplementary Movie 2).

185 We have recently shown that altered numbers of synaptogenic filopodia lead to  
186 changes in synapse numbers<sup>14</sup>. We therefore tested the effects of a loss of autophagy on R7  
187 axon terminal filopodial dynamics during synapse formation (developmental time point P60).  
188 Both *atg6* and *atg7* mutants exhibited selectively increased lifetimes of the population of  
189 long-lived axonal filopodia compared to wild type and *atg6* rescued photoreceptors  
190 (Supplementary Fig. 4; Supplementary Table 1). Wild type axon terminals only formed 1-2  
191 synaptogenic filopodia, as characterized by their bulbous tips, at any point in time (Fig. 5b, f-  
192 g), which previously led us to propose a serial synapse formation process that slowly spreads  
193 out the formation of 20-25 synapses over 50 hours<sup>14</sup> (also see Supplementary Movie 3). In  
194 contrast, loss of *atg6* or *atg7* in R7 axon terminals led to 3-4 synaptogenic filopodia at any  
195 time point (Fig. 5c-d and 5f-g; Supplementary Movie 3). As expected for synaptogenic  
196 filopodia, almost all supernumerary bulbous tips were stable for more than 40 minutes (Fig.  
197 5g). Increased autophagy in *atg6* rescued mutant photoreceptors reversed this effect and lead  
198 to a significant reduction and destabilization of synaptogenic filopodia (Fig. 5e-g;  
199 Supplementary Movie 3). Consistent with selective autophagosome formation in  
200 synaptogenic filopodia tips, the changes to filopodial dynamics were remarkably specific to  
201 long-lived, synaptogenic filopodia (Fig. 5b-g; Supplementary Fig. 4; Supplementary Table 1).  
202 In sum, analyses of R7 axon terminal dynamics during synapse formation in the intact brain  
203 revealed autophagosome formation in synaptogenic filopodia and a specific effect of  
204 autophagy function on the kinetics and stability of these filopodia.

205

### 206 **A developmental model quantitatively predicts the measured increase in synapse** 207 **numbers based on measured filopodial kinetics in autophagy mutants**

208 Next we asked whether the observed changes to the kinetics of synaptogenic filopodia  
209 are sufficient to quantitatively explain changes in synapse formation throughout the second  
210 half of fly brain development. We first counted the numbers of overall filopodia, bulbous tip  
211 filopodia and synapses at time points every ten hours between P40 and P100 in fixed  
212 preparations (Fig. 6a-c). Compared to control, loss of *atg6* or *atg7* in photoreceptors led to  
213 mild increases in overall filopodia, while leaving the rates of change largely unaltered  
214 between time points (Fig. 6a). In contrast, numbers of synaptogenic bulbous tip filopodia are  
215 increased 2-fold throughout the main period of synapse formation (P60-P80; Fig. 6b;  
216 Supplementary Fig. 5). Synapse numbers, based on presynaptic *Brp*<sup>short</sup> labeling, commences  
217 indistinguishably from wild type, but then increases at a higher rate throughout brain  
218 development (Fig. 6c).

219 We previously developed a data-driven Markov state model that predicts the slow,  
220 serial development of synapses throughout the second half of brain development based on  
221 stochastic filopodial exploration and one-by-one selection of synaptogenic filopodia<sup>14</sup>. To  
222 test how autophagy-dependent changes of filopodial kinetics affect synapse formation in the  
223 model, we used the measured live dynamics of filopodia at P60 (Fig. 5b-g; Supplementary  
224 Fig. 4; Supplementary Tables 1-3) together with the measured fixed time points data for  
225 filopodia (Fig. 6a-b; Supplementary Fig. 5) as input. As shown in Fig. 6d to 6f, the model

226 recapitulates all aspects of synaptogenic filopodial dynamics and synapse formation for both  
227 loss and upregulation of autophagy. The model thereby shows that the measured changes in  
228 filopodial kinetics, and specifically altered stabilization of synaptogenic filopodia, are  
229 sufficient to cause the observed alterations in synapse formation over time (see ‘Mathematical  
230 modeling’ in Materials and Methods). These findings raise the question how autophagy can  
231 specifically regulate the kinetics of synaptogenic filopodia mechanistically.

232

### 233 **Degradation of synaptic building material through autophagy modulates filopodia** 234 **kinetics and synapse formation**

235 We have previously shown that the early synaptic seeding factors Syd1 and Liprin- $\alpha$   
236 are allocated to only 1-2 filopodia at any given time point and that their loss leads to the  
237 destabilization of synaptogenic filopodia and a loss of synapses<sup>14</sup>. Autophagy is a protein  
238 degradation pathway that affects filopodia stability in opposite ways in loss- versus gain-of-  
239 function experiments. We therefore hypothesized that autophagic degradation may directly  
240 regulate the availability of synaptic building material in filopodia. We first tested this idea  
241 using a second Markov state model that simulates the stabilization of filopodia as a function  
242 of seeding factor accumulation and degradation on short time scales (Fig. 6g and  
243 Supplementary Fig. 6a). In this ‘winner-takes-all’ model, synaptic seeding factors are a  
244 limiting resources in filopodia that increase filopodia lifetime, which in turn increases the  
245 time available for further accumulation of synaptic seeding factors, creating a positive  
246 feedback loop<sup>14</sup>. If autophagy plays a role in the degradation of synaptic seeding factors,  
247 then decreased autophagic degradation of synaptic seeding factors should lead to more  
248 synaptogenic filopodia, while increased autophagic degradation should reduce synaptogenic  
249 filopodia through further restriction of the limiting resource (Fig. 6g and Supplementary Fig.  
250 6a). The simulations show that the measured number of synaptogenic filopodia (Fig. 6h) and  
251 their lifetimes (Supplementary Fig. 6) can be quantitatively explained by degradation, and  
252 thus availability, of synaptic seeding factors for both loss and upregulation of autophagy at  
253 P60. Specifically, the number of long-lived filopodia at autophagy-deficient axon terminals  
254 was increased compared to control and conversely increased autophagic activity led to a  
255 decreased lifespan of filopodia as measured (Supplementary Fig. 4 and Supplementary Table  
256 1). Hence, the mechanistic model predicts that modulation of autophagy affects the  
257 degradation and availability of synaptic seeding factors. This primary defect causes  
258 secondary changes to filopodial kinetics and synapse formation.

259 To validate the primary defect, we expressed GFP-tagged versions of the synaptic  
260 seeding factors Syd-1 and Liprin- $\alpha$  and analyzed their restricted localization to synaptogenic  
261 filopodia. Autophagy-deficient terminals contain 2-3 times more synaptogenic filopodia with  
262 synaptic seeding factors compared to control; conversely, upregulation of autophagy leads to  
263 reduction of seeding factors in filopodia (Fig. 6i-k). In addition, the majority of Atg8-positive  
264 autophagosomes present at filopodia tips colocalizes with with Syd-1 and Liprin- $\alpha$   
265 (Supplementary Fig. 7a-c). Previous work in primary vertebrate neuronal culture as well as  
266 *Drosophila* R1-R6 photoreceptors has shown that autophagosomes formed at axon terminals

267 traffic retrogradely to the cell body<sup>29,44</sup>. We therefore analyzed photoreceptor cell bodies and  
268 found large Atg8-positive multivesicular bodies containing Syd-1 (Supplementary Fig. 7d-e).  
269 Together, these findings indicate that autophagy controls the amount of synaptic seeding  
270 factors in filopodia, thereby affecting their stability and potential to form synapses.

271

272 **Incorrect synaptic partnerships result from terminal-wide loss of kinetic restriction, not**  
273 **from filopodia-specific regulation of autophagy**

274 Autophagy-dependent filopodial kinetics and synapse formation could lead to  
275 synapses with incorrect partners through at least two mechanisms. In one scenario, autophagy  
276 could be triggered only in specific filopodia, e.g. based on a molecular signal for a contact  
277 with an incorrect partner neuron in a wrong layer. Loss of autophagy would then lead to a  
278 defect in the specific removal of incorrect synapses. In support of this idea, specific  
279 presynaptic proteins have recently been shown to induce autophagy at specific places in the  
280 presynapse<sup>45,46</sup>. Alternatively, autophagy could set a global threshold for kinetic restriction,  
281 such that only synaptic partners with sufficient spatial availability and molecular affinity can  
282 form synapses.

283 To distinguish between these two models, we quantified the relative increases of all  
284 filopodia, synaptogenic filopodia, and synapses along the R7 axon terminal in medulla layers  
285 M1-M6 (Fig. 7a-d). Loss of either *atg6* or *atg7* increases the absolute numbers of  
286 synaptogenic filopodia and synapses in all medulla layers equally approximately 1.5-fold  
287 (dotted lines in Fig. 7b-d). As a result, the relative levels of synaptogenic filopodia and  
288 synapses between layers M1-M6 remain the same as in wild type (solid lines in Fig. 7b-d).  
289 These data indicate that autophagy is not differentially triggered in filopodia in specific  
290 medulla layers. Instead, loss of autophagy equally increases the stability of synaptogenic  
291 filopodia across the R7 terminal, resulting in the stabilization of only few filopodia in layers  
292 with low baseline filopodial activity, and more pronounced increases in layers with higher  
293 baseline filopodial activity. Conversely, destabilization of filopodia along the entire R7 axon  
294 terminal in wild type effectively excludes synapse formation in layers with few filopodia, e.g.  
295 in layer M2 (Fig. 7a-d). We conclude that autophagy levels set a threshold for kinetic  
296 restriction across the R7 axon terminal.

297 The threshold for kinetic restriction effectively excludes synapse formation with at  
298 least six potential postsynaptic partners that are not otherwise prevented from forming  
299 synapses with R7 (Fig. 7e). We note that the localization of the presumptive dendritic trees of  
300 these six neuron types correlates well with the probabilities to be incorrectly recruited as  
301 postsynaptic partners (Fig. 3f and Fig. 7e). We speculate that specificity arises through a  
302 combination of context-dependent molecular interactions, positional effects and kinetic  
303 restriction.

304

305

## 306 **Discussion**

307 Brain wiring requires synaptic partner choices that are both specific and robust in time  
308 and space<sup>47</sup>. To what extent spatiotemporal vicinity of potential partner neurons facilitates or  
309 determines partner choice remains unclear. Our findings suggest that spatiotemporal vicinity  
310 is restricted by filopodial kinetics and that axon terminal autophagy functions as a modulator  
311 of these dynamics. Hence, kinetic restriction of synaptogenic filopodia is a means to  
312 effectively exclude synapse formation with incorrect partners (Fig. 7e). Conversely,  
313 increased stabilization of synaptogenic filopodia reveals a surprisingly varied population of  
314 interneurons that have the principle capacity to form synapses with R7 axon terminals. At  
315 least Mi1, Mi4, C3, C2, Mi8 and Tm1 neurons in medulla columns are not prevented by  
316 'molecular mismatch' from forming synaptic contacts with R7 in a normal developmental  
317 environment.

318

## 319 **Kinetic restriction sharpens synaptic specificity based on molecular and cellular** 320 **interactions**

321 Numerous studies have shown that neurons in ectopic locations readily form synapses  
322 with incorrect partners, including themselves<sup>6,7,48</sup>. On the other hand, Mi1, Mi4, C3, C2, Mi8  
323 and Tm1 are likely to express cell surface proteins that bias the likelihood of synaptic contacts  
324 with R7 and other partners<sup>10,16,49</sup>. Axonal and dendritic interaction dynamics may greatly  
325 facilitate, or restrict, what partner neurons get 'to see each other' and initiate synapse  
326 formation based on molecular interactions<sup>1</sup>. Recent evidence highlighted the importance of  
327 positional strategies for synaptic partner choice prior to such molecular recognition<sup>7,11,48</sup>.  
328 Here we have shown that positional effects do not only depend on when and where neuronal  
329 processes can be seen in fixed preparations, but are a function of their dynamics and  
330 stabilization kinetics. Hence, synaptic specificity can emerge from the context-dependent  
331 combination of molecular interactions with a cell biological mechanism like autophagy, that  
332 by itself carries no synaptic specificity information. We speculate that different neural  
333 thresholds for kinetic restriction can critically contribute to sharpen specificity as part of the  
334 brain's developmental growth program.

335

## 336 **A role for developmental autophagy in synapse formation and brain wiring**

337 Our data support the idea that autophagy indiscriminately destabilizes R7  
338 synaptogenic filopodia in a manner consistent with the local degradation of a limiting  
339 resource of proteins required for synapse formation. Specificity of autophagic degradation  
340 can be triggered through interactions with proteins that themselves serve as cargo or restrict  
341 the time and place where potentially less specific engulfment occurs<sup>19,45,46</sup>. The bulbous tips  
342 of synaptogenic filopodia are a small space that may be easily destabilized through autophagic  
343 engulfment of proteins and other cargo, even if that engulfment were to occur in a non-

344 selective manner. We therefore propose that putative cargo-specificity of autophagy may not  
345 be a prerequisite for the developmental function of autophagy described here.

346 We have previously shown that spatiotemporally regulated membrane receptor  
347 degradation is required for synapse-specific wiring in the *Drosophila* visual system<sup>50</sup>. In  
348 order for degradation of receptors or synaptic seeding factors to serve as regulators of  
349 spatiotemporal specificity, the degraded proteins must undergo continuous turnover.  
350 Specificity therefore arises through a combination of developmentally regulated protein  
351 synthesis, trafficking and degradation, which are likely to differ for different proteins and  
352 neurons at different points in time and space.

353 Based on this combinatorial model for specificity, we speculate that many mutations  
354 and single nucleotide polymorphisms in the genome can result in small cell biological  
355 changes that differentially affect neurons during brain wiring. The changes effected through  
356 such modulatory, 'permissive' mechanisms may not be predictable at the level of circuit  
357 wiring and behavior, yet they can cause meaningful changes to behavior that are both  
358 selectable and heritable and thus a means of evolutionary programming of neural circuits.

359

360

## 361 **References**

- 362 1 Sudhof, T. C. Towards an Understanding of Synapse Formation. *Neuron* **100**, 276-293,  
363 doi:10.1016/j.neuron.2018.09.040 (2018).
- 364 2 Sando, R., Jiang, X. & Sudhof, T. C. Latrophilin GPCRs direct synapse specificity by  
365 coincident binding of FLRTs and teneurins. *Science* **363**, doi:10.1126/science.aav7969  
366 (2019).
- 367 3 Hart, M. P. & Hobert, O. Neurexin controls plasticity of a mature, sexually dimorphic  
368 neuron. *Nature* **553**, 165-170, doi:10.1038/nature25192 (2018).
- 369 4 Hong, W., Mosca, T. J. & Luo, L. Teneurins instruct synaptic partner matching in an  
370 olfactory map. *Nature* **484**, 201-207, doi:10.1038/nature10926 (2012).
- 371 5 Apostolo, N. & de Wit, J. Compartmentalized distributions of neuronal and glial cell-  
372 surface proteins pattern the synaptic network. *Curr Opin Neurobiol* **57**, 126-133,  
373 doi:10.1016/j.conb.2019.01.025 (2019).
- 374 6 Van Der Loss, H. & Glaser, E. M. Autapses in neocortex cerebri: synapses between a  
375 pyramidal cell's axon and its own dendrites. . *Brain Research*, 355-360 (1972).
- 376 7 Hassan, B. A. & Hiesinger, P. R. Beyond Molecular Codes: Simple Rules to Wire  
377 Complex Brains. *Cell* **163**, 285-291, doi:10.1016/j.cell.2015.09.031 (2015).
- 378 8 Petrovic, M. & Schmucker, D. Axonal wiring in neural development: Target-  
379 independent mechanisms help to establish precision and complexity. *Bioessays* **37**,  
380 996-1004, doi:10.1002/bies.201400222 (2015).
- 381 9 Courgeon, M. & Desplan, C. Coordination of neural patterning in the *Drosophila*  
382 visual system. *Curr Opin Neurobiol* **56**, 153-159, doi:10.1016/j.conb.2019.01.024  
383 (2019).
- 384 10 Hadjieconomou, D., Timofeev, K. & Salecker, I. A step-by-step guide to visual circuit  
385 assembly in *Drosophila*. *Curr Opin Neurobiol* **21**, 76-84,  
386 doi:10.1016/j.conb.2010.07.012 (2011).

- 387 11 Balaskas, N., Abbott, L. F., Jessell, T. M. & Ng, D. Positional Strategies for Connection  
388 Specificity and Synaptic Organization in Spinal Sensory-Motor Circuits. *Neuron*,  
389 doi:10.1016/j.neuron.2019.04.008 (2019).
- 390 12 Hiesinger, P. R. *et al.* Activity-independent prespecification of synaptic partners in the  
391 visual map of *Drosophila*. *Curr Biol* **16**, 1835-1843, doi:10.1016/j.cub.2006.07.047  
392 (2006).
- 393 13 Ozel, M. N., Langen, M., Hassan, B. A. & Hiesinger, P. R. Filopodial dynamics and  
394 growth cone stabilization in *Drosophila* visual circuit development. *Elife* **4**,  
395 doi:10.7554/eLife.10721 (2015).
- 396 14 Ozel, M. N. *et al.* Serial Synapse Formation through Filopodial Competition for  
397 Synaptic Seeding Factors. *Dev Cell*, doi:10.1016/j.devcel.2019.06.014 (2019).
- 398 15 Takemura, S. Y. *et al.* A visual motion detection circuit suggested by *Drosophila*  
399 connectomics. *Nature* **500**, 175-181, doi:10.1038/nature12450 (2013).
- 400 16 Kolodkin, A. L. & Hiesinger, P. R. Wiring visual systems: common and divergent  
401 mechanisms and principles. *Curr Opin Neurobiol* **42**, 128-135,  
402 doi:10.1016/j.conb.2016.12.006 (2017).
- 403 17 Takemura, S. Y. *et al.* Synaptic circuits and their variations within different columns in  
404 the visual system of *Drosophila*. *Proc Natl Acad Sci U S A* **112**, 13711-13716,  
405 doi:10.1073/pnas.1509820112 (2015).
- 406 18 Zschatzsch, M. *et al.* Regulation of branching dynamics by axon-intrinsic asymmetries  
407 in Tyrosine Kinase Receptor signaling. *Elife* **3**, e01699, doi:10.7554/eLife.01699  
408 (2014).
- 409 19 Stavoe, A. K. H. & Holzbaur, E. L. F. Autophagy in Neurons. *Annu Rev Cell Dev Biol*,  
410 doi:10.1146/annurev-cellbio-100818-125242 (2019).
- 411 20 Menzies, F. M. *et al.* Autophagy and Neurodegeneration: Pathogenic Mechanisms  
412 and Therapeutic Opportunities. *Neuron* **93**, 1015-1034,  
413 doi:10.1016/j.neuron.2017.01.022 (2017).
- 414 21 Nikolettou, V. & Tavernarakis, N. Regulation and Roles of Autophagy at  
415 Synapses. *Trends Cell Biol* **28**, 646-661, doi:10.1016/j.tcb.2018.03.006 (2018).
- 416 22 Vijayan, V. & Verstreken, P. Autophagy in the presynaptic compartment in health and  
417 disease. *J Cell Biol* **216**, 1895-1906, doi:10.1083/jcb.201611113 (2017).
- 418 23 Hernandez, D. *et al.* Regulation of presynaptic neurotransmission by  
419 macroautophagy. *Neuron* **74**, 277-284, doi:10.1016/j.neuron.2012.02.020 (2012).
- 420 24 Juhasz, G., Erdi, B., Sass, M. & Neufeld, T. P. Atg7-dependent autophagy promotes  
421 neuronal health, stress tolerance, and longevity but is dispensable for  
422 metamorphosis in *Drosophila*. *Genes Dev* **21**, 3061-3066, doi:10.1101/gad.1600707  
423 (2007).
- 424 25 Stavoe, A. K., Hill, S. E., Hall, D. H. & Colon-Ramos, D. A. KIF1A/UNC-104 Transports  
425 ATG-9 to Regulate Neurodevelopment and Autophagy at Synapses. *Dev Cell* **38**, 171-  
426 185, doi:10.1016/j.devcel.2016.06.012 (2016).
- 427 26 Shen, W. & Ganetzky, B. Autophagy promotes synapse development in *Drosophila*. *J*  
428 *Cell Biol* **187**, 71-79, doi:10.1083/jcb.200907109 (2009).
- 429 27 Tang, G. *et al.* Loss of mTOR-dependent macroautophagy causes autistic-like synaptic  
430 pruning deficits. *Neuron* **83**, 1131-1143, doi:10.1016/j.neuron.2014.07.040 (2014).
- 431 28 Lieberman, O. J., McGuirt, A. F., Tang, G. & Sulzer, D. Roles for neuronal and glial  
432 autophagy in synaptic pruning during development. *Neurobiol Dis* **122**, 49-63,  
433 doi:10.1016/j.nbd.2018.04.017 (2019).

- 434 29 Jin, E. J. *et al.* Live Observation of Two Parallel Membrane Degradation Pathways at  
435 Axon Terminals. *Curr Biol* **28**, 1027-1038 e1024, doi:10.1016/j.cub.2018.02.032  
436 (2018).
- 437 30 Shrivage, B. V., Hill, J. H., Powers, C. M., Wu, L. & Baehrecke, E. H. Atg6 is required  
438 for multiple vesicle trafficking pathways and hematopoiesis in *Drosophila*.  
439 *Development* **140**, 1321-1329, doi:10.1242/dev.089490 (2013).
- 440 31 Wang, T., Lao, U. & Edgar, B. A. TOR-mediated autophagy regulates cell death in  
441 *Drosophila* neurodegenerative disease. *J Cell Biol* **186**, 703-711,  
442 doi:10.1083/jcb.200904090 (2009).
- 443 32 Colomb, J., Reiter, L., Blaszkiewicz, J., Wessnitzer, J. & Brembs, B. Open source  
444 tracking and analysis of adult *Drosophila* locomotion in Buridan's paradigm with and  
445 without visual targets. *PLoS One* **7**, e42247, doi:10.1371/journal.pone.0042247  
446 (2012).
- 447 33 Schmid, A. *et al.* Activity-dependent site-specific changes of glutamate receptor  
448 composition in vivo. *Nat Neurosci* **11**, 659-666, doi:10.1038/nn.2122 (2008).
- 449 34 Karuppudurai, T. *et al.* A hard-wired glutamatergic circuit pools and relays UV signals  
450 to mediate spectral preference in *Drosophila*. *Neuron* **81**, 603-615,  
451 doi:10.1016/j.neuron.2013.12.010 (2014).
- 452 35 Gao, S. *et al.* The neural substrate of spectral preference in *Drosophila*. *Neuron* **60**,  
453 328-342, doi:10.1016/j.neuron.2008.08.010 (2008).
- 454 36 Talay, M. *et al.* Transsynaptic Mapping of Second-Order Taste Neurons in Flies by  
455 trans-Tango. *Neuron* **96**, 783-795 e784, doi:10.1016/j.neuron.2017.10.011 (2017).
- 456 37 Takemura, S. Y., Lu, Z. & Meinertzhagen, I. A. Synaptic circuits of the *Drosophila* optic  
457 lobe: the input terminals to the medulla. *J Comp Neurol* **509**, 493-513,  
458 doi:10.1002/cne.21757 (2008).
- 459 38 Takemura, S. Y. *et al.* The comprehensive connectome of a neural substrate for 'ON'  
460 motion detection in *Drosophila*. *Elife* **6**, doi:10.7554/eLife.24394 (2017).
- 461 39 Strother, J. A. *et al.* The Emergence of Directional Selectivity in the Visual Motion  
462 Pathway of *Drosophila*. *Neuron* **94**, 168-182 e110, doi:10.1016/j.neuron.2017.03.010  
463 (2017).
- 464 40 Behnia, R., Clark, D. A., Carter, A. G., Clandinin, T. R. & Desplan, C. Processing  
465 properties of ON and OFF pathways for *Drosophila* motion detection. *Nature* **512**,  
466 427-430, doi:10.1038/nature13427 (2014).
- 467 41 Fischbach, K. F. & Dittrich, A. P. M. The optic lobe of *Drosophila melanogaster*. I. A  
468 Golgi analysis of wild-type structure. *Cell and Tissue Research* **258**,  
469 doi:10.1007/bf00218858 (1989).
- 470 42 Feinberg, E. H. *et al.* GFP Reconstitution Across Synaptic Partners (GRASP) defines cell  
471 contacts and synapses in living nervous systems. *Neuron* **57**, 353-363,  
472 doi:10.1016/j.neuron.2007.11.030 (2008).
- 473 43 Macpherson, L. J. *et al.* Dynamic labelling of neural connections in multiple colours by  
474 trans-synaptic fluorescence complementation. *Nat Commun* **6**, 10024,  
475 doi:10.1038/ncomms10024 (2015).
- 476 44 Maday, S. & Holzbaur, E. L. Autophagosome biogenesis in primary neurons follows an  
477 ordered and spatially regulated pathway. *Dev Cell* **30**, 71-85,  
478 doi:10.1016/j.devcel.2014.06.001 (2014).
- 479 45 Soukup, S. F. *et al.* A LRRK2-Dependent EndophilinA Phosphoswitch Is Critical for  
480 Macroautophagy at Presynaptic Terminals. *Neuron* **92**, 829-844,  
481 doi:10.1016/j.neuron.2016.09.037 (2016).

- 482 46 Okerlund, N. D. *et al.* Bassoon Controls Presynaptic Autophagy through Atg5. *Neuron*  
483 **93**, 897-913 e897, doi:10.1016/j.neuron.2017.01.026 (2017).
- 484 47 Hiesinger, P. R. & Hassan, B. A. The Evolution of Variability and Robustness in Neural  
485 Development. *Trends Neurosci* **41**, 577-586, doi:10.1016/j.tins.2018.05.007 (2018).
- 486 48 Kulkarni, A., Ertekin, D., Lee, C. H. & Hummel, T. Birth order dependent growth cone  
487 segregation determines synaptic layer identity in the Drosophila visual system. *Elife*  
488 **5**, e13715, doi:10.7554/eLife.13715 (2016).
- 489 49 Melnattur, K. V. & Lee, C. H. Visual circuit assembly in Drosophila. *Dev Neurobiol* **71**,  
490 1286-1296, doi:10.1002/dneu.20894 (2011).
- 491 50 Williamson, W. R., Yang, T., Terman, J. R. & Hiesinger, P. R. Guidance receptor  
492 degradation is required for neuronal connectivity in the Drosophila nervous system.  
493 *PLoS Biol* **8**, e1000553, doi:10.1371/journal.pbio.1000553 (2010).
- 494 51 Linneweber, G. *et al.* A neurodevelopmental origin of behavioral individuality  
495 doi:10.1101/540880 (2019).
- 496 52 Dercksen, V. J., Hege, H. C. & Oberlaender, M. The Filament Editor: An Interactive  
497 Software Environment for Visualization, Proof-Editing and Analysis of 3D Neuron  
498 Morphology. *Neuroinformatics* **12**, 325-339, doi:10.1007/s12021-013-9213-2 (2013).
- 499 53 Sato, M., Bitter, I., Bender, M. A. & Kaufman, A. E. TEASAR: Tree-structure extraction  
500 algorithm for accurate and robust skeletons. *Paper presented at: Proceedings the*  
501 *Eighth Pacific 5 Conference on Computer Graphics and Applications* (2000).
- 502 54 Ozel, M. N. *et al.* Serial synapse formation through filopodial competition for synaptic  
503 seeding factors *Developmental Cell* (in press).

504

505

## 506 **Acknowledgements**

507 We would like to thank Mathias Wernet and all members of the Hiesinger, Wernet and  
508 Hassan labs for their support and helpful discussions. We thank Eric Baehrecke and Stephan  
509 Sigrist for reagents. F.R.K acknowledges Gizem Sancer for her help to design ‘*trans*-Tango’  
510 experiments. This work was supported by the NIH (RO1EY018884) and the German  
511 Research Foundation (DFG, SFB 958, SFB186) and FU Berlin. B.H. was supported by an  
512 Einstein BIH Fellowship. M.v.K acknowledges financial support from the German ministry  
513 for education and science (BMBF) through grant number 031A307 and from the Einstein  
514 Stiftung Berlin and the DFG, provided through the excellence cluster Math+.

515

## 516 **Author contributions**

517 F.R.K and P.R.H. designed the project. F.R.K performed all experiments except the Buridan's  
518 paradigm. Behavioral experiments were designed, carried out and analyzed by G.A.L and  
519 B.A.H. S.V.G. performed 4D tracking analyses of filopodial dynamics. M.v.K. performed all  
520 computational modeling. F.R.K, B.A.H., M.v.K and P.R.H. wrote the paper.

521

## 522 **Competing interests**

523 The authors declare no competing interests.

524

525

526

527

528

529

530

531

532

533

534



535

536 **Fig. 1. Autophagy deficiency in *Drosophila* photoreceptors leads to increased**  
 537 **neurotransmission and visual attention. a-b,** Newly-hatched (0-day old) genetic mosaic  
 538 flies with autophagy-deficient (*atg6* and *atg7* mutants) photoreceptors exhibit normal eye  
 539 morphology (**a**) and axonal projections in the optic lobe (**b**). **c,** Representative  
 540 electroretinogram (ERG) traces. **d-e,** Quantification of ERG depolarization (**d**) and on-  
 541 transient (**e**) amplitudes relative to control. Rescue of *atg6* mutant photoreceptors with  
 542 GMR>*atg6* expression leads to overcompensation and increased autophagy (see  
 543 Supplementary Fig. 1).  $n=20$  flies per condition. Unpaired t-test; \* $p<0.05$ , \*\* $p<0.01$ ,  
 544 \*\*\* $p<0.001$ . Error bars denote mean  $\pm$  SEM. **f,** Buridan's paradigm arena to measure object  
 545 orientation response of adult flies, with two black stripes positioned opposite to each other as  
 546 visual cues. **g,** The parameter 'stripe deviation' measures how much a fly deviates from a  
 547 straight path between the black stripes in the arena. **h,** Stripe fixation behavior of adult flies  
 548 with *atg6* mutant photoreceptors, photoreceptors with upregulated autophagy (*atg6*,  
 549 GMR>*Atg6*) and their genetically matched controls are shown on the population level  
 550 (heatmap) and as individual tracks. Flies with *atg6* mutant photoreceptors show reduced stripe  
 551 deviation, whereas increased autophagy (*atg6*, GMR>*Atg6*) leads to increased stripe  
 552 deviation. **i,** Quantification of stripe deviation.  $n=60$  flies per condition, two-way ANOVA  
 553 and Tukey HSD as post hoc test, \*\*\* $p<0.001$ .



554  
555  
556  
557  
558  
559  
560  
561  
562  
563  
564  
565  
566  
567  
568  
569  
570  
571  
572  
573  
574  
575

**Fig. 2. Autophagy-deficient *Drosophila* photoreceptors form supernumerary synapses.** **a-d'**, Representative images of R1-R6 and R7 photoreceptor axon terminals with Brp<sup>short-GFP</sup> marked active zones in wild-type (**a-a'**), *atg7* mutant (**b-b'**), *atg6* mutant (**c-c'**), and *atg6*, GMR>Atg6 (**d-d'**). Red boxes show supernumerary synapses in loss of autophagy at distal part of R7 axon terminals. **e-f**, Number of Brp puncta per terminal in R1-R6 (**e**) and R7 (**f**) photoreceptors. n=40 terminals per condition. Unpaired t-test; \*p<0.05, \*\*p<0.01, \*\*\*p<0.001, \*\*\*\*p<0.001. Error bars denote mean ± SEM. **g**, Number of Brp puncta in distinct medulla layers along R7 axon terminals (See 'Materials and Methods' for the definition of medulla layers). Unpaired t-test; \*p<0.05, \*\*p<0.01, \*\*\*p<0.001. Error bars denote mean ± SEM.



576  
577  
578  
579  
580  
581  
582  
583  
584  
585  
586  
587  
588  
589  
590

**Fig. 3. Loss of autophagy leads to synaptic connections with aberrant neuronal partners.** **a-b**, Neurons post-synaptic to control (**a**) and *atg6* mutant (**b**) R7s are labelled with *trans*-Tango (see ‘Materials and Methods’ for full genotypes, magenta=post-synaptic neurons, green=CadN; Me=medulla, Lo=lobula, Lop=Lobula plate). **c**, Number of post-synaptic neurons per optic lobe for control and *atg6* mutant R7s based on *trans*-Tango-labeled cell body counts. Unpaired t-test, \*\**p*<0.01. **d**, Examples of aberrant neuronal partners of autophagy-deficient R7s, with individual neurons pseudo-colored in white. **e**, Schematic of dendritic and axonal arborization of aberrant neuronal partners (Adapted from Fischbach and Dittrich, 1989)<sup>41</sup>. **f**, Number of each aberrant neuronal partners per optic lobe from 1-week old fly brains. Note that only ~10% of R7s are mutant for *atg6* and *trans*-Tango labeling is dependent on synaptic strength between partners and progressively increase through age. See ‘Materials and Methods’ for detailed *Drosophila* genotypes used to perform *trans*-Tango experiments.



591

592

593 **Fig. 4. Synaptic connections between autophagy-deficient R7s and aberrant postsynaptic**

594 **partners are functional based on activity-dependent GRASP. a-c'**, Activity-dependent

595 GRASP between control R7s and Mi1s (a-a'), C2s (b-b'), and Mi4s (c-c') show that wild-

596 type R7s very rarely form synaptic connections, if any, with Mi1, C2, and Mi4 neurons. d-f'

597 Activity-dependent GRASP between *atg6* mutant R7s and Mi1s (d-d'), C2s (e-e'), and Mi4s

598 (f-f') show widespread active synaptic connections between autophagy-deficient R7s and

599 aberrant post-synaptic partners. Regions inside yellow rectangles are shown in close-up

600 images as single greyscale GRASP channels. See 'Materials and Methods' for Mi1, Mi4, and

601 C2-specific LexA drivers and detailed *Drosophila* genotypes used to perform GRASP

602 experiments.

603

604

605

606

607

608

609



610

611 **Fig. 5. Autophagy regulates the stability of synaptogenic filopodia at axon terminals.**  
 612 **a**, Live imaging of Atg5-GFP expressing R7 axon terminals in intact, developing *Drosophila*  
 613 brain shows formation of autophagosomes at the bulbous tips of synaptogenic filopodia<sup>14</sup>  
 614 followed by the collapse of filopodia (P+60%). **b-e**, Live imaging of R7 axon terminals at  
 615 P+60% (during synaptogenesis) revealed increased stability of synaptogenic filopodia in  
 616 autophagy-deficient R7 terminals (**c** and **d**) and decreased stability in R7 terminals with  
 617 upregulated autophagy (**e**) compared to control (**b**). Yellow arrowheads: stable synaptogenic  
 618 filopodia; white arrowheads: unstable bulbous tip filopodia. **f**, Number of concurrently  
 619 existing bulbous tip filopodia per R7 axon terminal per time instance. **g**, Total number of  
 620 synaptogenic filopodia per R7 axon terminal per hour. Autophagy-deficient R7 terminals  
 621 exhibit significantly more stable synaptogenic filopodia (>40min) whereas upregulated  
 622 autophagy leads to filopodia destabilization. n=7 terminals per condition. Unpaired t-test;  
 623 \*p<0.05, \*\*\*p<0.001. Error bars denote mean ± SEM.  
 624



625

626 **Fig. 6. Loss of autophagy increases the number of synaptogenic filopodia through**  
 627 **defective synaptic seeding factor degradation, leading to increased synapse formation**  
 628 **throughout development. a-c**, Quantification of filopodia numbers (a), synaptogenic  
 629 filopodia numbers (b), and Brp puncta numbers (c) during synaptogenesis (P40-P90) per R7  
 630 axon terminal based on fixed data. n=40 terminals per condition. **d-f**, Markov State Model  
 631 simulation based on data in (a) and live data at P+60% (Figure 5) for filopodia numbers (d),  
 632 synaptogenic filopodia numbers (e), and Brp puncta numbers per R7 axon terminal (f). **g**, The  
 633 mechanistic model: accumulation of synaptic seeding factors stabilizes synaptogenic  
 634 filopodia; autophagic degradation of synaptic seeding factors destabilizes filopodia.  
 635 **h**, Measured (solid bars) and simulated (striped bars) synaptogenic filopodia numbers at  
 636 P+60% (the simulated data are based on synaptic seeding factor availability, see  
 637 Supplementary Fig. 6). **i**, Representative images of synaptic seeding factors (Syd1 and Liprin-  
 638 α) localizing to synaptogenic filopodia. **j-k**, Quantifications of the number of Liprin-α (j) and  
 639 Syd1 (k) positive synaptogenic filopodia. n=30 terminals per condition. Unpaired t-test;  
 640 \*p<0.05, \*\*p<0.01, \*\*\*p<0.001. Error bars denote mean ± SEM.

641

642

643

644



645

646 **Fig. 7. Loss of autophagy recruits incorrect synaptic partners by lowering an axon**  
 647 **terminal-wide threshold for kinetic restriction of synapse formation. a**, Representative R7  
 648 axon terminals at P+70% with medulla layer information. Note that the edge of medulla (M0)  
 649 is defined as 0 and the end of M6 layer is defined as 100 to calculate relative positions of all  
 650 filopodia and bulbous tip filopodia and distributed to medulla layers (M1-M6) using the  
 651 relative thickness of medulla layers defined by Fiscbach and Dittrich, 1989<sup>41</sup>. **b-d**, Relative  
 652 frequency (solid lines) and absolute numbers (dotted lines) of all filopodia at P+70% (**b**),  
 653 synaptogenic filopodia at P+70% (**c**), and synapses at 0-day old adult (**d**). M1-M6 denote  
 654 medulla layers. n=40 terminals per condition. **e**, Model: Loss of autophagy during  
 655 synaptogenesis increases the probability distribution (yellow area) compared to wild type  
 656 (grey area) of forming connections with post-synaptic partners through increased filopodial  
 657 stability. Note that cells with projections at medulla layers where R7s form most of their  
 658 synapses (Mi1, Mi4, C2, C3) incorrectly synapse with R7s with higher probability than the  
 659 cells with projections at medulla layers where R7s form a few, if any, synapses (Mi8, Tm1)  
 660 (See Figure 3e and 3f).

661

662

663

664

665

666

667

## 668 MATERIALS AND METHODS

669

### 670 EXPERIMENTAL MODEL AND SUBJECT DETAILS

671 Flies were reared at 25°C on standard cornmeal/yeast diet unless stated otherwise. For  
672 developmental analyses white pre-pupae (P+0%) were collected and incubated at 25°C to  
673 pupal stages stated on figures. The following *Drosophila* strains were either obtained from  
674 Bloomington *Drosophila* Stock Center (BDSC) or other groups: *atg6*<sup>1</sup> and UAS-  
675 *Atg6*.ORF.3xHA (E.H. Baehrecke); *atg7*<sup>d4</sup> (T.Neufeld); UAS-Brpshort-GFP, UAS-Syd1-  
676 GFP, and UAS-Liprin $\alpha$ -GFP (S.Sigrist); Trans-tango flies (G.Barnea); GRASP flies (BDSC);  
677 *ey3.5*flp, *GMR*flp, *GMR*-Gal4, *FRT42D*, *FRT82B*, *GMR*-Gal80, *tub*-Gal80, UAS-CD4-  
678 tdtGFP, UAS-CD4-tdtomato, UAS-*Atg5*-GFP, UAS-*Atg8*-GFP, *GMR22F08*-LexA (C2-  
679 specific driver), *GMR49B06*-LexA (Mi4-specific driver), and *GMR19F01*-LexA (Mi1-  
680 specific driver) (BDSC).

681

#### 682 *Drosophila* genotypes

##### 683 Figure 1

684 **a-i, Controls:** *ey3.5*flp; *FRT42D*/*FRT42D*, *Cl*<sup>w+</sup>, *ey3.5*flp; *GMR*-Gal4/+; *FRT82B*/*FRT82B*,  
685 *Cl*<sup>w+</sup>, *atg7*: *ey3.5*flp; *FRT42D*, *atg7*<sup>d4</sup>/*FRT42D*, *Cl*<sup>w+</sup>, *atg6*: *ey3.5*flp;*GMR*-Gal4/+; *FRT82B*,  
686 *atg6*<sup>1</sup>/*FRT82B*, *Cl*<sup>w+</sup>, *atg6*, *GMR*>*Atg6*: *ey3.5*flp;*GMR*-Gal4/+; *FRT82B*, *atg6*<sup>1</sup>, UAS-  
687 *Atg6*.ORF.3xHA /*FRT82B*, *Cl*<sup>w+</sup>.

##### 688 Figure 2

689 **a-g, Controls:** *GMR*flp; *FRT42D*, *GMR*-Gal80/*FRT42D*; *GMR*-Gal4, UAS-CD4-  
690 tdtomato/UAS-Brp<sup>short</sup>-GFP, *GMR*flp; *GMR*-Gal4, UAS-CD4-tdtomato/UAS-Brp<sup>short</sup>-GFP;  
691 *FRT82B*/*FRT82B*, *tub*-Gal80, *atg7*: *GMR*flp; *FRT42D*, *GMR*-Gal80/*FRT42D*, *atg7*<sup>d4</sup>; *GMR*-  
692 Gal4, UAS-CD4-tdtomato/UAS-Brp<sup>short</sup>-GFP, *atg6*: *GMR*flp; *GMR*-Gal4, UAS-CD4-  
693 tdtomato/UAS-Brp<sup>short</sup>-GFP; *FRT82B*, *atg6*<sup>1</sup>/*FRT82B*, *tub*-Gal80, *atg6*, *GMR*>*Atg6*:  
694 *GMR*flp; *GMR*-Gal4, UAS-CD4-tdtomato/UAS-Brp<sup>short</sup>-GFP; *FRT82B*, *atg6*<sup>1</sup>, UAS-  
695 *Atg6*.ORF.3xHA/*FRT82B*, *tub*-Gal80.

696

697

698 Figure 3

699 **a-f, Control:** GMRflp/UAS-myrGFP, QUAS-mtdtomato(3xHA); Rh4-Gal4/trans-Tango;  
700 FRT82B/FRT82B, tub-Gal80, atg6: GMRflp/UAS-myrGFP, QUAS-mtdtomato(3xHA); Rh4-  
701 Gal4/trans-Tango; FRT82B, atg6<sup>1</sup>/FRT82B, tub-Gal80.

702 Figure 4

703 **a-c', Control:** GMRflp; Rh4-Gal4, UAS-nSyb::splitGFP1-10, LexAop-splitGFP11::GFP/  
704 GMR19F01-LexA (Mi1) or GMR22F08-LexA (C2) or GMR49B06-LexA (Mi4);  
705 FRT82B/FRT82B, tub-Gal80

706 **d-f', atg6:** GMRflp; Rh4-Gal4, UAS-nSyb::splitGFP1-10, LexAop-splitGFP11::GFP/  
707 GMR19F01-LexA (Mi1) or GMR22F08-LexA (C2) or GMR49B06-LexA (Mi4); FRT82B,  
708 atg6<sup>1</sup>/FRT82B, tub-Gal80

709 Figure 5

710 **a,** GMRflp; FRT42D, GMR-Gal80/FRT42D; GMR-Gal4, UAS-CD4-tdtomato/UAS-Atg5-  
711 GFP.

712 **b-g, Controls:** GMRflp; FRT42D, GMR-Gal80/FRT42D; GMR-Gal4, UAS-CD4-tdGFP,  
713 GMRflp; GMR-Gal4, UAS-CD4-tdGFP; FRT82B, tub-Gal80/FRT82B, atg7: GMRflp;  
714 FRT42D, atg7<sup>d4</sup>/FRT42D, tub-Gal80; GMR-Gal4, UAS-CD4-tdGFP, atg6: GMRflp; GMR-  
715 Gal4, UAS-CD4-tdGFP; FRT82B, atg6<sup>1</sup>/FRT82B, tub-Gal80, atg6, GMR>Atg6: GMRflp;  
716 GMR-Gal4, UAS-CD4-tdGFP; FRT82B, atg6<sup>1</sup>, UAS-Atg6.ORF.3xHA/FRT82B, tub-Gal80.

717 Figure 6

718 **a-b, Controls:** GMRflp; FRT42D, GMR-Gal80/FRT42D; GMR-Gal4, UAS-CD4-tdGFP,  
719 GMRflp; GMR-Gal4, UAS-CD4-tdGFP; FRT82B, tub-Gal80/FRT82B, atg7: GMRflp;  
720 FRT42D, atg7<sup>d4</sup>/FRT42D, GMR-Gal80; GMR-Gal4, UAS-CD4-tdGFP, atg6: GMRflp;  
721 GMR-Gal4, UAS-CD4-tdGFP; FRT82B, atg6<sup>1</sup>/FRT82B, tub-Gal80, atg6, GMR>Atg6:  
722 GMRflp; GMR-Gal4, UAS-CD4-tdGFP; FRT82B, atg6<sup>1</sup>, UAS-Atg6.ORF.3xHA/FRT82B,  
723 tub-Gal80.

724 **c, Control:** GMRflp; FRT42D/FRT42, GMR-Gal80; GMR-Gal4, UAS-CD4-tdtomato, UAS-  
725 Brp<sup>short</sup>-GFP, atg7: GMRflp; FRT42D, atg7<sup>d4</sup>/FRT42, GMR-Gal80; GMR-Gal4, UAS-CD4-  
726 tdtomato, UAS-Brp<sup>short</sup>-GFP, atg6: GMRflp; GMR-Gal4, UAS-CD4-tdtomato, UAS-Brp<sup>short</sup>-  
727 GFP; FRT82B, atg6<sup>1</sup>/FRT82B, tub-Gal80, atg6, GMR>Atg6: GMRflp; GMR-Gal4, UAS-

728 CD4-tdtomato/UAS-Brp<sup>short</sup>-GFP; FRT82B, *atg6*<sup>1</sup>, UAS-Atg6.ORF.3xHA/FRT82B, tub-  
729 Gal80.

730 **i-k, Controls:** GMRflp; FRT42D, UAS-Liprin- $\alpha$ -GFP or UAS-Syd-1-GFP/FRT42D, GMR-  
731 Gal80; GMR-Gal4, UAS-CD4-tdtomato, GMRflp; GMR-Gal4, UAS-CD4-tdtomato, UAS-  
732 Liprin- $\alpha$ -GFP or UAS-Syd-1-GFP; FRT82B/FRT82B, tub-Gal80, *atg7*: GMRflp; FRT42D,  
733 *atg7*<sup>d4</sup>, UAS-Liprin- $\alpha$ -GFP or UAS-Syd-1-GFP/FRT42D, tub-Gal80; GMR-Gal4, UAS-CD4-  
734 tdtomato, *atg6*: GMRflp; GMR-Gal4, UAS-CD4-tdtomato, UAS-Liprin- $\alpha$ -GFP or UAS-Syd-  
735 1-GFP; FRT82B, *atg6*<sup>1</sup>/FRT82B, tub-Gal80; *atg6*, GMR>Atg6: GMRflp; GMR-Gal4, UAS-  
736 CD4-tdtomato/ UAS-Liprin- $\alpha$ -GFP or UAS-Syd-1-GFP; FRT82B, *atg6*<sup>1</sup>, UAS-  
737 Atg6.ORF.3xHA/FRT82B, tub-Gal80.

738 Figure 7

739 **a-c, Controls:** GMRflp; FRT42D, GMR-Gal80/FRT42D; GMR-Gal4, UAS-CD4-tdGFP,  
740 GMRflp; GMR-Gal4, UAS-CD4-tdGFP; FRT82B, tub-Gal80/FRT82B, *atg7*: GMRflp;  
741 FRT42D, *atg7*<sup>d4</sup>/FRT42D, GMR-Gal80; GMR-Gal4, UAS-CD4-tdGFP, *atg6*: GMRflp;  
742 GMR-Gal4, UAS-CD4-tdGFP; FRT82B, *atg6*<sup>1</sup>/FRT82B, tub-Gal80.

743 **d, Control:** GMRflp; FRT42D/FRT42, GMR-Gal80; GMR-Gal4, UAS-CD4-tdtomato, UAS-  
744 Brp<sup>short</sup>-GFP, *atg7*: GMRflp; FRT42D, *atg7*<sup>d4</sup>/FRT42, GMR-Gal80; GMR-Gal4, UAS-CD4-  
745 tdtomato, UAS-Brp<sup>short</sup>-GFP, *atg6*: GMRflp; GMR-Gal4, UAS-CD4-tdtomato, UAS-Brp<sup>short</sup>-  
746 GFP; FRT82B, *atg6*<sup>1</sup>/FRT82B, tub-Gal80.

747

#### 748 **Immunohistochemistry and fixed imaging**

749 Pupal and adult eye-brain complexes were dissected in cold Schneider's Drosophila medium  
750 and fixed in 4% paraformaldehyde (PFA) in PBS for 40 minutes. Tissues were washed in  
751 PBST (0.4% Triton-X) and mounted in Vectashield (Vector Laboratories, CA). Images were  
752 obtained with a Leica TCS SP8-X white laser confocal microscope with a 63X glycerol  
753 objective (NA=1.3). The primary antibodies used in this study with given dilutions were as  
754 follows: mouse monoclonal anti-Chaoptin (1:200; Developmental Studies Hybridoma Bank);  
755 rat monoclonal anti-nCadherin (1:100; Developmental Studies Hybridoma Bank); rabbit  
756 monoclonal anti-Atg8 (1:100; Abcam); goat polyclonal anti-GFP (1:1000; Abcam); rat  
757 monoclonal anti-GFP (1:500; BioLegend); rabbit polyclonal anti-CD4 (1:600; Atlas  
758 Antibodies); rabbit polyclonal anti-DsRed (1:500; ClonTech); rabbit anti-Syd1 (1:500; gift

759 from Sigrist Lab). The secondary antibodies Cy3, Cy5 (Jackson ImmunoResearch  
760 Laboratories) and Alexa488 (Invitrogen) were used in 1:500 dilution.

761

### 762 **Brain culture and live imaging**

763 For all ex vivo live imaging experiments an imaging window cut open removing posterior  
764 head cuticle partially. The resultant eye-brain complexes were mounted in 0.4% dialyzed low-  
765 melting agarose in a modified culture medium as described before<sup>13</sup>. Live imaging was  
766 performed using a Leica SP8 MP microscope with a 40X IRAPO water objective (NA=1.1)  
767 with a Chameleon Ti:Sapphire laser and Optical Parametric Oscillator (Coherent). For single  
768 channel CD4-tdGFP imaging the excitation laser was set to 900 nm and for two-color  
769 GFP/tomato imaging lasers were set to 890 nm (pump) and 1090 nm (OPO).

770

### 771 **Trans-tango and activity-dependent GRASP**

772 For both trans-tango and GRASP experiments mosaic control and autophagy-deficient R7  
773 photoreceptors were generated by MARCM using the combination of GMRflp and R7-  
774 specific driver Rh4-Gal4 (see “Drosophila genotypes” section for detailed genotypes). Trans-  
775 tango flies were raised at 25°C and transferred to 18°C on the day of eclosion<sup>36</sup>. After 1 week  
776 of incubation at 18°C, brains were dissected and stained using a standard antibody staining  
777 protocol to label postsynaptic neurons of R7 photoreceptors. The number of postsynaptic  
778 neurons was counted manually from their cell bodies using cell counter plugin in Fiji  
779 including all cell bodies with weak or strong labelling to reveal all potential connections. For  
780 activity-dependent GRASP experiments, flies were transferred to UV-transparent Plexiglas  
781 vials on the day of eclosion and kept in a custom-made light box with UV light (25°C, 20-4  
782 light-dark cycle) for 3 days to activate UV-sensitive R7 photoreceptors. Brains were dissected  
783 and stained with a polyclonal anti-GFP antibody to label R7 photoreceptors, monoclonal anti-  
784 GFP antibody to label GRASP signal, and polyclonal anti-CD4 antibody to label postsynaptic  
785 neurons<sup>43</sup>.

786

### 787 **Electroretinogram (ERG) recordings**

788 Newly-hatched (0-day old) adult flies were collected and glued on slides using nontoxic  
789 school glue. Flies were exposed to alternating 1s “on” 2s “off” light stimulus provided by

790 computer-controlled white LED system (MC1500; Schott). ERGs were recorded using  
791 Clampex (Axon Instruments) and quantified using Clampfit (Axon Instruments).

792

### 793 **Buridan's paradigm object orientation assay**

794 Fly object orientation behavior was tested according to standard protocols using flies grown in  
795 low densities in a 12/12-hour light dark cycle<sup>32,51</sup>. The behavioral arena consisted of a round  
796 platform of 117 mm in diameter, surrounded by a water-filled moat and placed inside a  
797 uniformly illuminated white cylinder. The setup was illuminated with four circular fluorescent  
798 tubes (Osram, L 40w, 640C circular cool white) powered by an Osram Quicktronic QT-M  
799 1×26–42. The four fluorescent tubes were located outside of a cylindrical diffuser (DeBanier,  
800 Belgium, 2090051, Kalk transparent, 180g, white) positioned 147.5 mm from the arena  
801 center. The temperature on the platform during the experiment was 25°C and 30 mm wide  
802 stripes of black cardboard were placed on the inside of the diffuser. The retinal size of the  
803 stripes depended on the position of the fly on the platform and ranged from 8.4° to 19.6° in  
804 width (11.7° in the center of the platform). Fly tracks were analyzed using CeTrAn<sup>32</sup> and  
805 custom written python code<sup>51</sup>. To reduce the complexity of the behavioral data, only absolute  
806 stripe deviation while moving was chosen, because this parameter gives a very good estimate  
807 of how precise the animals follow an object orientated path. It is calculated as an average of  
808 all points of the fly path away from an imaginary line through the two black vertical bars. For  
809 the absolute stripe deviation, it is irrelevant whether the fly deviates to the right or left. The  
810 data was statistically analyzed using ANOVA and Tukey HSD as a posthoc test using R.

811

## 812 **QUANTIFICATION AND STATISTICAL ANALYSIS**

### 813 **Synapse number analysis**

814 All imaging data were analyzed and presented with Imaris (Bitplane). For synapse number  
815 analysis, CD4-tomato channel was used to generate Surfaces for individual axon terminals  
816 and Brp-positive puncta inside the Surface are filtered using the masking function. Brp-  
817 positive puncta in photoreceptor terminals were automatically detected with the spot detection  
818 module (spot diameter was set to 0.3 μ) using identical parameters between experimental  
819 conditions and corresponding controls. Synapse numbers were taken and recorded directly  
820 from statistics tab of Spot function. Graph generation and statistical analyses were done using  
821 GraphPad Prism 8.

822

### 823 **Filopodia, Bulbous tip filopodia, synapse distribution analysis**

824 All imaging data were analyzed and presented with Imaris (Bitplane). For synapse distribution  
825 analysis, Brp-positive puncta were detected following the same steps in “Synapse number  
826 analysis” in R7 axon terminals. Start and endpoints of axon terminals were selected manually  
827 with the measurements point module using nCad staining as a reference (start  
828 point=beginning of nCad staining at the most distal part of medulla (M0), end point=the  
829 beginning of M7, serpentine layer in the medulla. Note that M7 layer is devoid of synapses,  
830 hence is not labelled by nCad. The length of axon terminals are measured with the  
831 measurement point module and normalized as start point = 0 and end point = 100. The actual  
832 positions of Brp-positive puncta were exported and relative positions were calculated  
833 according to the normalized length of axon terminals. The following equation is used to  
834 calculate relative positions of Brp-positive puncta: relative position = (actual position-start  
835 point)/length x 100. For all filopodia and bulbous tip filopodia distribution analysis, the same  
836 steps were followed except that spots were manually placed on the emerging points of all  
837 visible filopodia. Graph generation and statistical analyses were done using GraphPad Prism  
838 8.

839

### 840 **Filopodia tracing**

841 Filopodia tracing was performed as previously described<sup>14</sup>. Briefly, we previously developed  
842 an extension to the Amira Filament Editor<sup>52</sup>, in which an individual growth cone is visualized  
843 as annotated skeleton tree where each branch corresponds to a filopodium. In the first time  
844 step of 4D data set, the user marks the GC center, which is automatically detected in the  
845 subsequent time steps. Filopodia tips marked by the user are automatically traced from the tip  
846 to the GC center based on an intensity-weighted Dijkstra shortest path algorithm<sup>53</sup>. The user  
847 visually verifies the tracing and corrects it using tools provided by the Filament Editor if  
848 necessary. After tracing all filopodia in the first time step, they are automatically propagated  
849 to the next time step with particular filopodia IDs. In every subsequent steps, the user verifies  
850 the generated tracings and adds newly emerged filopodia. This process continues until all time  
851 steps have been processed. Statistical quantities are directly extracted from the Filament  
852 Editor as spreadsheets for further data analysis.

853

854 **Mathematical modeling**

855 We adopted the data-driven stochastic model from <sup>14</sup>. In short, the model structure remained  
 856 identical, while we estimated genotype-specific parameters from the live imaging data  
 857 presented in this manuscript (Figure 5b-e; Supplementary Movie 3; Table S2). In brief, we  
 858 modelled synapses (S), short-lived transient bulbous tips (sB) that appeared and disappeared  
 859 within the 60 minutes imaging interval and stable synaptogenic bulbous tips (synB) that  
 860 persisted for more than 40 minutes. We also modelled two types of filopodia, which are  
 861 distinguished by their lifetime and were denoted short-lived- (sF) and long-lived (F) filopodia.

862 The model's reaction stoichiometries are determined by the following reaction scheme:

863



864

865 where reactions  $R_{1,sF}$  and  $R_{1,\ell F}$  denote the generation of short- and long-lived filopodia, while  
 866  $R_{2,sF}$  and  $R_{2,\ell F}$  denote their retraction. Reaction  $R_3$  denotes the formation of a (transient)  
 867 bulbous tip, while  $R_4$  denotes its retraction. Reaction  $R_5$  denotes the stabilization of a  
 868 transient bulbous tip, and finally a stable bulb forms a synapse with reaction  $R_6$ .

869 Note that in  $R_3$  we denote by F any filopodium (short-lived and long-lived) and in  $R_4$  we have  
 870 ignored the flux back into the filopodia compartment  $sF + \ell F$  as it insignificantly affects the  
 871 number number of filopodia (small number of bulbous tips, small rate  $r_4$ ).

872 Similar to the published model <sup>14</sup>, reaction rates/propensities of the stochastic model are given  
 873 by

$$\begin{aligned}
 r_{1,sF}(t) &= f_F(t) \cdot c_{1,sF}, & r_{2,sF}(sF) &= sF \cdot c_{2,sF} \\
 r_{1,\ell F}(t) &= f_F(t) \cdot c_{1,\ell F}, & r_{2,\ell F}(sF) &= \ell F \cdot c_{2,\ell F} \\
 r_3(t, sF, \ell F, B) &= c_3(sF + \ell F) \cdot f_1(\text{synB}, B_{50}) \cdot f_{FB}\left(t, t_{\frac{1}{2}}\right), & r_4(sB) &= c_4 \cdot sB \\
 r_5(sB) &= c_5 \cdot sB, & r_6(\text{synB}) &= c_6 \cdot \text{synB},
 \end{aligned}$$

874

875 where  $c_1 \dots c_6$  are reaction constants (estimated as outlined below). The feedback function  
876  $f_1(\text{syn}B, B_{50}) = (\text{syn}B + B_{50})/B_{50}$  models bulbous auto-inhibition due to limited resources  
877 and synaptic seeding factor competition as introduced before<sup>14</sup>. The functions  $f_F(t)$  and  
878  $f_{FB}\left(t, t_{\frac{1}{2}}\right)$  model slow-scale dynamics of filopodia- and bulbous dynamics, with previously  
879 determined parameters<sup>14</sup>:

880

881  $f_{FB}(t)$  is a tanh function with

882

$$f_{FB}(t, t_{1/2}) = \frac{1}{2} \left( 1 + \tanh \left[ \frac{3}{t_{1/2}} (t - t_{1/2}) \right] \right)$$

883

884 that models a time-dependent increase in the propensity to form bulbous tips with  $t_{1/2} = 1000$   
885 (min). The time-dependent function  $f_F(t) = \max(0, \sum_{i=0}^5 p_i \cdot t^i)$  is a fifth-order polynome  
886 with coefficients  $p_5 = -2.97 \cdot 10^{-14}$ ,  $p_4 = 3.31 \cdot 10^{-13}$ ,  $p_3 = -1.29 \cdot 10^{-9}$ ,  $p_2 = 2.06 \cdot 10^{-6}$ ,  $p_1 =$   
887  $-1.45 \cdot 10^{-3}$  and  $p_0 = 1$  that down-regulates the generation of new filopodia at a slow time  
888 scale. Note, that  $t$  denotes the time in (min) after P40 (e.g.  $t_{P40} = 0$  and  $t_{P60} = 60 \cdot 20$ ).

889 **Parameter estimation.** Using the methods explained below, we derived the parameters  
890 depicted in Table S2. We first estimated  $c_{2,sF}$ ,  $c_{2,\ell F}$  from the filopodial lifetime data, whereby  
891  $c_{2,sF}$  was approximated as the inverse of the lifetimes of all filopodia that lived *less than* 8  
892 minutes and  $c_{2,\ell F}$  from all filopodia living *at least* 8 minutes. We realized that the number of  
893 filopodia per time instance was Poisson distributed (Supplementary Fig. 4, solid black lines),  
894 i.e.  $sF \sim \mathcal{P}(\lambda_{sF})$  and  $\ell F \sim \mathcal{P}(\lambda_{\ell F})$ , where  $\lambda$  denotes the average number of filopodia per time  
895 instance. Given the first-order retraction of filopodia ( $\approx$  exponential lifetime), the Poisson  
896 distribution can be explained by a zero-order input with rate  $c_{1,sF}$  and  $c_{1,\ell F}$  and  $\lambda_{sF} =$   
897  $r_{1,sF}/c_{2,sF}$  and  $\lambda_{\ell F} = r_{1,\ell F}/c_{2,\ell F}$  respectively. Using the mean number of  $sF$ ,  $\ell F$  at P60 we  
898 then estimated  $c_{1,sF} = \lambda_{sF}(P60) \cdot c_{2,sF}/f_F(P60)$  and  $c_{1,\ell F} = \lambda_{\ell F}(P60) \cdot c_{2,\ell F}/f_F(P60)$ .

899 Next, we investigated the lifetimes of bulbous tip filopodia (Supplementary Fig. 6b-e). We  
900 realized that akin to the *wild type*, the *atg6* and *atg7* exhibited almost no transient bulbous  
901 tips. We therefore set  $c_4 = 1/120$  ( $\text{min}^{-1}$ ) according to the published model<sup>54</sup>. Furthermore,  
902 we determined  $c_6$  from the steepest slope in Fig. 6c (control data) divided by the average

903 number of Bulbs ( $5 \approx \int_t^{t+\Delta t} r_6(s) ds = \int_t^{t+\Delta t} \text{synB}(s) \cdot c_6 ds \Rightarrow c_6 \approx \frac{5}{1.1 \cdot 10^{-60}} = 1/133$   
 904  $\text{min}^{-1}$ ). We then estimated the three parameters  $c_5$ ,  $B_{50}$  and  $r_3(t)$  for  $t = P60$ . To do so, we used  
 905 the number distribution of short-lived and synaptogenic bulbous tips (Figure 5f-g) and set up  
 906 the generator matrix

$$\begin{aligned} G([i, j], [i - 1, j]) &= i \cdot c_4, & G([i, j], [i, j - 1]) &= j \cdot c_6 \\ G([i, j], [i + 1, j]) &= r_3(t) \cdot f_1(j, B_{50}), & G([i, j], [i, j + 1]) &= j \cdot c_5 \end{aligned}$$

907

908 with diagonal elements such that the row sum equals 0. In the notation above, the tuple  $[i, j]$   
 909 denotes the state where  $i$  short-lived bulbous tips  $sB$  and  $j$  synaptogenic bulbous tips  $\text{synB}$  are  
 910 present. The generator above has a reflecting boundary at sufficiently large  $N$  (maximum  
 911 number of bulbous tips). Above,  $r_3(t)$  is auto-inhibited by the number of stable bulbous tips  
 912 through function  $f_1$ . The stationary distribution of this model is derived by solving the  
 913 eigenvalue problem

$$G^T \cdot v = v \cdot \lambda$$

914 and finding the eigenvector corresponding to eigenvalue  $\lambda_0 = 0$ . From this stationary  
 915 distribution, we compute the marginal densities of  $sB$  and  $\text{synB}$  (e.g. summing over all states  
 916 where  $i = 0, 1, \dots$  for  $sB$ ) and fit them to the experimentally derived frequencies by  
 917 minimizing the Kullback-Leibler divergence between the experimental and model-predicted  
 918 distributions. Lastly, parameter  $c_3$  is derived by calculating

919

$$c_3 = \frac{r_3(t)}{(sF(t) + \ell F(t)) \cdot f_{FB}(t, t_{1/2})} \quad (1)$$

920

921 where  $sF(t) = sF(t_{P60})$ ,  $\ell F(t) = \ell F(t_{P60})$  and  $f_{FB}(t) = f_{FB}(t_{P60}, t_{1/2})$ .

922

923 **Mechanistic model explains autophagy mutant phenotypes as a consequence of**  
 924 **increased seeding factor abundance.** We adopted the mechanistic model from <sup>14</sup>. This  
 925 model essentially assumes a dynamic pool of a limited resource of bulbous-tip stabilizing  
 926 factors (Fig. 6g; Supplementary Fig. 6a). The model consists of four types of reactions: new  
 927 filopodia emerge (reaction  $G_1$ ), accumulate resources (reaction  $G_2$ ), retract (reaction  $G_3$ ) or  
 928 release resources (reaction  $G_4$ ).



929 where  $F$  denotes an ‘empty’ filopodium,  $S$  denotes the seeding factor and  $FS_i$  denotes a  
930 filopodium with  $i$  seeding factor proteins in it. The reaction rates (propensities) were modelled  
931 as

$$\begin{aligned} g_1 &= \text{const}, & g_2(i-1) &= FS_{i-1} \cdot S \cdot c_{in}, \\ g_3(i) &= FS_i \cdot \frac{1}{i}, & g_4(i) &= FS_i \cdot c_{out}, \end{aligned}$$

932 where we set  $g_1$  equal to the average rate of transient bulbous tip emergence in the control  
933 experiments at P60, i.e.  $g_1 = r_3(t_{P60}, WT)$ . Reaction rate  $g_3$  implements a competitive  
934 advantage: the lifetime of bulbous filopodia is increased proportionally to the number of  
935 seeding factors it accumulated. The parameters  $c_{in}$  and  $c_{out}$  were set to values 0.07 and 1.5  
936 ( $\text{time}^{-1}$ ) and as initial condition we set  $S(t_0) = \|\|n \cdot \bar{B}(t_{P60})\|\|$ , where  $n$  is the number of states  
937 (we used  $n = 120$ ),  $\bar{B}(t_{P60})$  denotes the genotype-specific average number of bulbous tips at  
938 P60 and  $\|\|\cdot\|\|$  denotes the next integer function.

939 Importantly, in the model, the wildtype and the *atg6*- and *atg7*-knockout mutants only differ  
940 in the total number of seeding factors available.

941 We stochastically ran the model 100,000 timesteps to reach a steady state and discarded the  
942 first half as a burn-in period (pre-steady state). Subsequently, we analyzed the number of  
943 bulbous tips and their lifetimes from the remaining time steps as shown in Supplementary Fig.  
944 6b-i. Thereby, we assumed that filopodia would be recognized as bulbous tips only if they  
945 contained at least  $n/4$  seeding factors.

946 In summary, these computational experiments highlight that the phenotype of the *atg6*- and  
947 *atg7*-knockout mutants can be solely explained by an increased abundance of seeding factors  
948 (= compromised ability to degrade seeding factors).

949 In the case of autophagy upregulation (*atg6*,  $GMR > Atg6$ ), we observed a different phenotype:  
950 From the data-driven model we could see that bulbous tips were destabilized (parameter  $r_4$  in  
951 Supplementary Table 2), and also that the feedback was lost (parameter  $E[f_1]$  close to 1 in  
952 Supplementary Table 2). We tested different parameter- and model alterations to reproduce  
953 both the number- and life time distribution of bulbous tips. Finally, we found that if seeding  
954 factors no longer stabilized bulbous tips (loss in the competitive advantage), both the life

955 time- and the number distribution of bulbous tips can be accurately reproduced. Thus, we set  
956 reaction rate  $g_3$  to  $g_3 = FS \cdot const$ , for autophagy upregulation, where  $const = c_4(\text{time}^{-1}$ ;  
957 Supplementary Table 3).

958

#### 959 **DATA AND CODE AVAILABILITY**

960 Raw (.lif format) and processed (.ims and .am format) imaging datasets are available on  
961 request. The filopodia tracking software is an extension of the commercial software Amira,  
962 which is available from Thermo Fisher Scientific. The filopodia tracking software is available  
963 from the corresponding author upon request in source code and binary form. Executing the  
964 binary requires a commercial license for Amira. MATLAB codes for model parameter  
965 inference for model simulation have previously been published<sup>14</sup> and are available through  
966 <https://github.com/vkleist/Filo> .

967

#### 968 **LEAD CONTACT AND MATERIALS AVAILABILITY**

969 All reagents used in this study are available for distribution. Requests for resources and  
970 reagents should be directed to Robin Hiesinger ([robin.hiesinger@fu-berlin.de](mailto:robin.hiesinger@fu-berlin.de)).

971

972

973 **Supplemental Information**

974

975

976

977 **Autophagy-dependent filopodial kinetics restrict synaptic partner choice**  
978 **during *Drosophila* brain wiring**

979

980 Ferdi Ridvan Kiral, Gerit Arne Linneweber, Svilen Veselinov Georgiev, Bassem A. Hassan,  
981 Max von Kleist, Peter Robin Hiesinger

982

983

984

985

986

987

988

989

990

991

992

993

994



995  
996 **Supplementary Figure 1. Atg6 and Atg7 are required for developmental autophagy in**  
997 ***Drosophila* photoreceptors. a-c'**, Atg8 immunolabelled autophagosomes in GFP-positive  
998 photoreceptor clones of *atg7<sup>d4</sup>* (a-a'), *atg6<sup>1</sup>* (b-b'), and *atg6<sup>1</sup>, GMR>Atg6* (c-c') versus non-  
999 GFP control clones in genetic mosaics of P+50% pupal retina. **d**, Number of autophagosomes  
1000 in a given volume. Note almost complete abolishment of autophagosomes in *atg7<sup>d4</sup>* and *atg6<sup>1</sup>*  
1001 mutant photoreceptors and a significant increase in autophagosome number in *atg6<sup>1</sup>,*  
1002 *GMR>Atg6* photoreceptors. n=8 retinas per condition, one region of interest is randomly  
1003 selected per retina. Unpaired t-test; \*\*\*p<0.001, \*\*\*\*p<0.0001. Error bars denote mean ±  
1004 SEM.

1005  
1006  
1007  
1008  
1009  
1010  
1011  
1012  
1013



1014

1015

1016 **Supplementary Figure 2. Loss of *atg7* in *Drosophila* photoreceptors leads to increased**

1017 **visual attention behavior. a,** Stripe fixation behavior of adult flies with control and *atg7*

1018 mutant photoreceptors is shown on the population level (heatmap) and as individual tracks.

1019 **b,** Quantification of stripe deviation. n=60 flies per condition, two-way ANOVA and Tukey

1020 HSD as post hoc test, \*\*\*p<0.001. Note that similar to flies with *atg6* mutant photoreceptors

1021 (see Fig. 1h), flies with *atg7* mutant photoreceptors show increased stripe fixation behavior

1022 and repetitive walks between stripes.

1023

1024

1025

1026

1027

1028

1029

1030

1031

1032

1033

1034

1035

1036

1037

1038

1039

1040



1041

1042

1043

1044

1045

1046

1047

1048

1049

1050

1051

1052

1053

1054

1055

1056

1057

1058

1059

1060

1061

1062

1063

1064

1065

1066

1067

1068

1069

1070

1071

1072

1073

1074

1075

1076

**Supplementary Figure 3. The essential autophagy proteins Atg5 and Atg8 localize to synaptogenic filopodia tips.** a-b', Localization of autophagy essential proteins Atg5 (a-a') and Atg8 (b-b') to bulbous tip filopodia (P+60%). Yellow arrows show the presence of Atg5 and Atg8 at bulbous tips, while white arrowheads show bulbous tips without Atg5 and Atg8. c, Percentage of bulbous tip filopodia with Atg5 and Atg8 signal to all bulbous tip filopodia. n=30 terminals. All bulbous tip filopodia from 30 axon terminals were pooled for quantification.



1077

1078

1079

1080

1081

1082

1083

1084

1085

1086

1087

1088

1089

1090

1091

1092

1093

1094

1095

1096

1097

1098

1099

1100

**Supplementary Figure 4. Number of short-lived and long-lived filopodia at P60.** Bars denote the observed numbers during live imaging and the dashed vertical line indicates the average numbers. The solid black trace depicts a Poisson distribution with expectation value equal to the average number of observed filopodia. short-lived filopodia = filopodia exist shorter than 8 mins, long-lived filopodia = filopodia exist longer than 8 mins. Values for lifetimes and numbers are shown in Supplementary Table 1.



1101

1102

1103 **Supplementary Figure 5. Morphology of R7 photoreceptor axon terminals throughout**

1104 **the second half of pupation (the period of synapse formation).** Representative images of

1105 control, atg7, and atg6 mutant R7 axon terminal morphologies at P+40%, P+50%, P+60%,

1106 P+70%, P+80%, and P+90% pupal development. Red arrowheads show examples of

1107 supernumerary bulbous tip filopodia at P+70%. Note that loss of autophagy leads to increased

1108 numbers of bulbous tip filopodia especially during the peak time of synaptogenesis (P+60%-

1109 P+80%).

1110

1111

1112

1113

1114

1115

1116

1117

1118

1119

1120

1121



1122

1123

1124

**Supplementary Figure 6. The Mechanistic Model: Lifetimes of synaptogenic bulbous tip**

1125

**filopodia as a function of a limiting resource of synaptic seeding factors. a,** Graphical

1126

depiction of the mechanistic model. **b-e,** Measured data: Histograms depicting the observed

1127

frequency of the respective bulbous tip life times during live imaging at P60. The numbers on

1128

histograms indicate the number of observations in the respective life time category per growth

1129

cone. Numbers in brackets with a star, e.g. (1\*), indicate that the bulbous tip either already

1130

existed in the first imaging frame, or persisted until the last image. Thus, these life times

1131

might actually be longer than indicated here. **f-i,** Model output: Histograms depicting the

1132

frequency of the respective bulbous tip lifetimes according to simulations using the

1133

mechanistic model. Note that the mechanistic model successfully recapitulates the observed

1134

lifetimes of bulbous tip filopodia.

1135

1136

1137

1138

1139

1140



1141

1142

1143 **Supplementary Figure 7. Autophagosomes colocalize with synaptic seeding factors at**  
 1144 **filopodia tips and contain synaptic seeding factors in large degradative multivesicular**  
 1145 **compartments at cell bodies. a-a''**, Representative R7 axon terminals expressing Liprin- $\alpha$ -  
 1146 GFP and Atg8-mCherry. **b-b''**, Representative R7 axon terminals expressing Syd-1-GFP and  
 1147 Atg8-mCh. Yellow arrows: co-localization of Atg8 with synaptic seeding factors Liprin- $\alpha$  and  
 1148 Syd-1 at filopodia tips; white arrowheads: Liprin- $\alpha$  and Syd-1 at filopodia tips without  
 1149 apparent Atg8 co-localization. **c**, Percentages of Syd-1 only, Liprin- $\alpha$  only, Atg8 and Syd-1  
 1150 together (Atg8 + Syd-1), Atg8 and Liprin- $\alpha$  together (Atg8 + Liprin- $\alpha$ ), and Atg8-only  
 1151 filopodia tips. n=30 terminals per condition. Note that most Atg8-positive compartments are  
 1152 also positive for the synaptic seeding factors. All filopodia from 30 terminals were pooled for  
 1153 quantification. **d-d'**, Atg8-positive multivesicular vacuoles contain endogenous Syd1  
 1154 (detected with anti-Syd1 antibody) at photoreceptor cell bodies. **e**, Schematic of proposed  
 1155 mechanism of degradation of synaptic seeding factors by autophagy in photoreceptor neurons,  
 1156 including capture at axon terminal filopodia tips and degradation during retrograde transport  
 1157 to the cell body, as first shown in vertebrate cell culture<sup>44</sup>.

1158

1159 **Supplementary Tables**

1160

|                        | Short lived (sF) |           | Long-lived (lF) |            |
|------------------------|------------------|-----------|-----------------|------------|
|                        | Life time        | Number    | Life time       | Number     |
| wild type              | 2.3 (1.6)        | 2.6 (1.8) | 15 (10)         | 2.6 (1.4)  |
| <i>atg6</i>            | 2.7 (1.9)        | 2 (2.3)   | 21 (16)         | 4.8 (1.2)  |
| <i>atg7</i>            | 2.4 (1.6)        | 2.2 (1.9) | 20 (15)         | 5.6 (2.6)  |
| <i>atg6</i> , GMR>Atg6 | 2.2 (1.7)        | 2.9 (1.9) | 13 (7)          | 1.4 (0.84) |

1161

1162

**Table S1:** Lifetimes (min) and average numbers of short- and long-lived filopodia at P60.

1163

Mean ± (standard deviation). Number distributions are shown in Supplementary Fig. 4.

1164

|                        | r3     | r2B    | E[f1]  | r4     | r5     | Avg. bulbs |
|------------------------|--------|--------|--------|--------|--------|------------|
| wild type              | 0.0122 | 0.0948 | 0.1291 | 0.0014 | 0.0108 | 1.653      |
| <i>atg6</i>            | 0.0229 | 0.0932 | 0.2463 | 0.0025 | 0.0205 | 3.028      |
| <i>atg7</i>            | 0.0189 | 0.1985 | 0.0955 | 0.0019 | 0.0170 | 2.501      |
| <i>atg6</i> , GMR>Atg6 | 0.1032 | 0.1085 | 0.9515 | 0.1010 | 0.0018 | 1.644      |

**Table S2:** Measured average rates of the data-driven model at P60.

The denotation is taken from the original model in Figure 3A of <sup>14</sup> and refer to the following filopodial transitions:



r3: measured rate of bulb formation, contains r2B \* f1, unit: 1/min

r2B: propensity to form bulbs, cannot be measured, because feedback f1 reduces r2B, shown is the only possible fit of r2B, unit: 1/min

f1: negative feedback on bulb formation, cannot be measure, see r5, shown is the only possible fit of the data (r2B; smaller f1 indicates stronger feedback; f1=1 indicates no feedback

r4: measured rate of bulb disappearance, unit: 1/min

r5: measured rate of bulb stabilization, unit: 1/min

Avg. bulbs: average number of bulbs per time instance (min) over an hour (P60)

In blue: direct measurements

1165

|                        | $c_{1,sF}$ | $c_{2,sF}$ | $c_{1,lF}$ | $c_{2,lF}$ | $c_3$ | $c_4$              | $c_5$ | $c_6$ | $B_{50}$ | $t_{1/2}$         |
|------------------------|------------|------------|------------|------------|-------|--------------------|-------|-------|----------|-------------------|
| wild type              | 1.82       | 0.43       | 0.28       | 0.07       | 0.024 | 1/120 <sup>§</sup> | 0.063 | 1/133 | 0.078    | 1000 <sup>§</sup> |
| <i>atg6</i>            | 1.19       | 0.37       | 0.37       | 0.05       | 0.018 | 1/120 <sup>§</sup> | 0.068 | 1/133 | 0.716    | 1000 <sup>§</sup> |
| <i>atg7</i>            | 1.48       | 0.42       | 0.45       | 0.05       | 0.033 | 1/120 <sup>§</sup> | 0.075 | 1/133 | 0.162    | 1000 <sup>§</sup> |
| <i>atg6</i> , GMR>Atg6 | 2.13       | 0.45       | 0.17       | 0.08       | 0.033 | 0.071              | 0.001 | 1/133 | 3.733    | 1000 <sup>§</sup> |

1166

**Table S3:** Parameters of the data-driven model. All parameters in units min<sup>-1</sup> except for B<sub>50</sub>

1167

(unitless) and t<sub>1/2</sub> (min). <sup>§</sup>previously determined <sup>14</sup>.
